41. Hasselager RP, Hallas J, Gögenur I: Inhalation or total intravenous anaesthesia and recurrence after colorectal cancer surgery: A propensity score matched Danish registry-based study. *Br J Anaesth* 2021; 126:921–30
42. Schaefer MS, Raub D, Xu X, Shaydenfish D, Teja B, Chhangani K, Grabitz SD, O’Gara B, Kienbaum P, Houle TT, Landoni G, Eikermann M: Association between propofol dose and 1-year mortality in patients with or without a diagnosis of solid cancer. *Br J Anaesth* 2020; 124:271–80
43. Elias KM, Kang S, Liu X, Horowitz NS, Berkowitz RS, Frenzl G: Anesthetic selection and disease-free survival following optimal primary cytoreductive surgery for stage III epithelial ovarian cancer. *Ann Surg Oncol* 2015; 22:1341–8

## ANESTHESIOLOGY REFLECTIONS FROM THE WOOD LIBRARY-MUSEUM

### Romancing the Elements: Ether as Solidly Platonic?

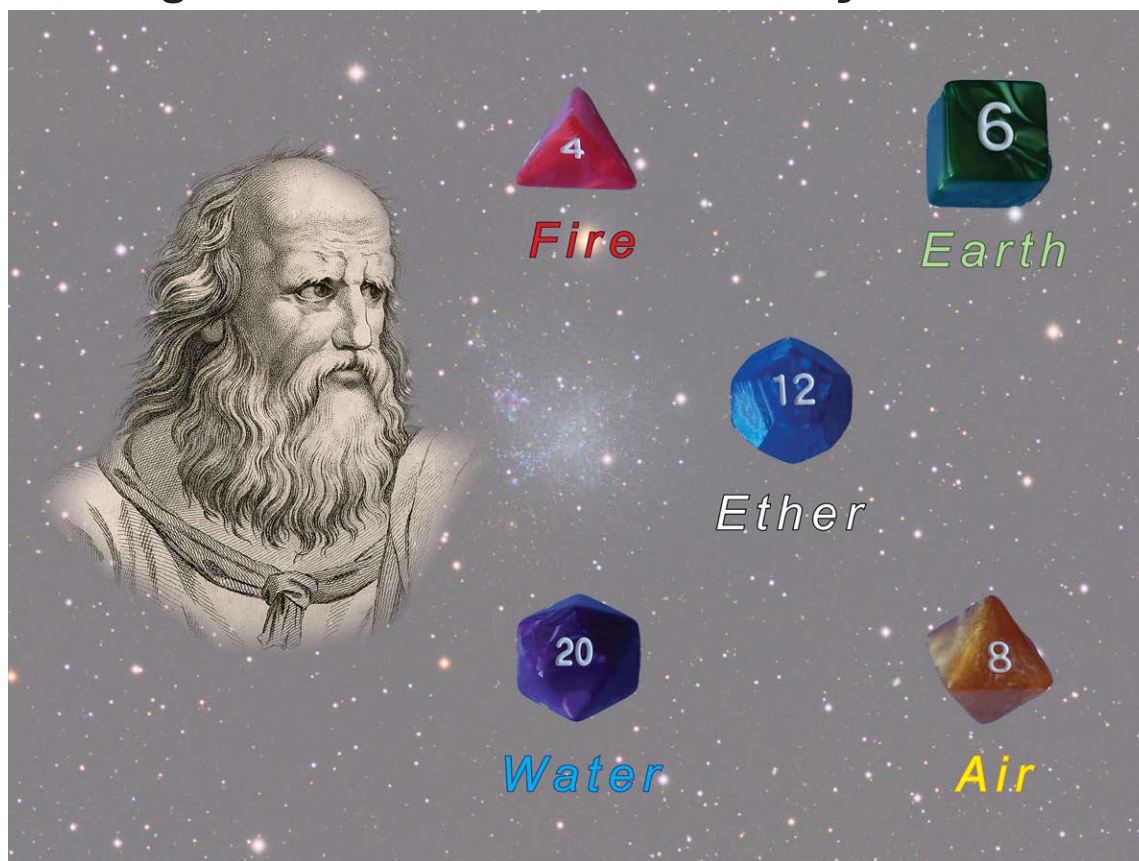

Millennia before five regular convex polyhedra rolled into modern gaming, Plato (*left*) popularized these perfect solids as representing the four classical elements and *Aether* (or Ether) in his masterwork, *Timaeus*. Fascinated by connections between the sensed and unsensed world, Plato rationalized the physical properties of each solid as an idealized representation of a specific element in his theory of matter. The tetrahedron (*red, upper left*) rises to a stabbing point, like the unbearable heat of Fire; the spinnable octahedron (*yellow, lower right*), Air; and the flowing, nearly spherical icosahedron (*purple, lower left*), Water. All three elements are formed from the same elementary triangle. The squarely grounded cube, however, symbolized Earth (*green, upper right*) and is incompatible with Fire, Water, and Air. Encompassing all four classical elements in its vast godly space, Ether, represented by the dodecahedron (*blue, center*), approximated the quintessence of the universe. By the end of the Renaissance, Ether, the grandest Platonic solid, would lend its lofty name to a famously volatile gas that would revolutionize surgery centuries later. (Copyright © the American Society of Anesthesiologists’ Wood Library-Museum of Anesthesiology. [www.woodlibrarymuseum.org](http://www.woodlibrarymuseum.org))

*Melissa L. Coleman, M.D., Associate Professor, Department of Anesthesiology and Perioperative Medicine, Penn State College of Medicine, Hershey, Pennsylvania, and George S. Bause, M.D., M.P.H., Wood Library-Museum Curator Emeritus.*
